# Supplementary material
Source: ML conference proceedings conference paper supplement (https://openaccess.thecvf.com/content/WACV2024/html/Ni_3D-Aware_Talking-Head_Video_WACV_2024_paper.html)
Supplement: Supplementary file 3 [file Ni_3D-Aware_Talking-Head_Video_WACV_2024_supplemental.zip]

Archive with 14 entries (14 files):
- readme.pdf
- __MACOSX/._readme.pdf
- 6-256x256.mp4
- __MACOSX/._6-256x256.mp4
- 4-cross_id.mp4
- __MACOSX/._4-cross_id.mp4
- 5-sota.mp4
- __MACOSX/._5-sota.mp4
- 3-same_id.mp4
- __MACOSX/._3-same_id.mp4
- 2-pose_control.mp4
- __MACOSX/._2-pose_control.mp4
- 1-canon_rgbd.mp4
- __MACOSX/._1-canon_rgbd.mp4
